# Supplementary material for: Short message service (SMS) reminders for childhood immunisation in low-income and middle-income countries: a systematic review and meta-analysis
Source: PubMed Central journal article supplement — BMJ Glob Health. 2021 Jul 21;6(7):e005035. doi: 10.1136/bmjgh-2021-005035 (PMC8296799; doi:10.1136/bmjgh-2021-005035), 2021-07-21
Supplement: bmjgh-2021-005035supp001.pdf [file bmjgh-2021-005035supp001.pdf]

**SUPPLEMENTARY MATERIALS****Supplement 1:** Childhood immunization schedule, World Health Organization (WHO), Updated September 2020

| Schedule  | Vaccine                                | Route of administration | Site                                 |
|-----------|----------------------------------------|-------------------------|--------------------------------------|
| Birth     | BCG (Bacillus Calmette–Guérin)         | Intradermal             | Left upper arm                       |
|           | OPV (Oral Polio Vaccine)               | Oral drops              | Mouth                                |
|           | Hep B <sub>0</sub>                     | Intramuscular           | Antero-lateral aspect of right thigh |
| 6 weeks,  | Pentavalent 1 (DPT, Hep B and Hib)     | Intramuscular           | Antero-lateral aspect of left thigh  |
|           | PCV 1 (Pneumococcal Conjugate Vaccine) | Intramuscular           | Antero-lateral aspect of right thigh |
|           | OPV 1                                  | Oral drops              | Mouth                                |
|           | Rotavirus vaccine 1                    | Oral drops              | Mouth                                |
| 10 weeks  | Pentavalent 2 (DPT, Hep B and Hib)     | Intramuscular           | Antero-lateral aspect of left thigh  |
|           | PCV 2 (Pneumococcal Conjugate Vaccine) | Intramuscular           | Antero-lateral aspect of right thigh |
|           | OPV 2                                  | Oral drops              | Mouth                                |
|           | Rotavirus vaccine 2                    | Oral drops              | Mouth                                |
| 14 weeks  | Pentavalent 3 (DPT, Hep B and Hib)     | Intramuscular           | Antero-lateral aspect of left thigh  |
|           | PCV 3 (Pneumococcal Conjugate Vaccine) | Intramuscular           | Antero-lateral aspect of left thigh  |
|           | OPV 3                                  | Oral drops              | Mouth                                |
|           | Rotavirus vaccine 3                    | Oral drops              | Mouth                                |
| 6 months  | Vitamin A (1st dose)                   | Oral drops              | Mouth                                |
| 9 months  | Measles vaccine (MCV1)                 | Subcutaneous            | Left upper arm                       |
|           | Yellow fever                           | Subcutaneous            | Left upper arm                       |
| 12 months | Vitamin A (2nd dose)                   | Oral drops              | Mouth                                |
|           | Meningitis                             | Intramuscular           | Antero-lateral aspect of left thigh  |
| 18 months | Measles vaccine (MCV2)                 | Subcutaneous            | Left upper arm                       |

Culled from Table 2: Summary of WHO Position Papers - Recommended Routine Immunizations for Children, World Health Organization (WHO), updated September 2020: [https://www.who.int/immunization/policy/immunization\\_routine\\_table2.pdf](https://www.who.int/immunization/policy/immunization_routine_table2.pdf)

**Supplement 2:** Inclusion and exclusion criteria for studies evaluating effectiveness of mobile-phone reminders on routine immunization in LMICs.

|                     | <b>Inclusion criteria</b>                                                                                                                                                               | <b>Exclusion criteria</b>                                                                                                                         |
|---------------------|-----------------------------------------------------------------------------------------------------------------------------------------------------------------------------------------|---------------------------------------------------------------------------------------------------------------------------------------------------|
| <b>Population</b>   | Infants less than 24 months of age<br>Low- and middle-income countries<br>Children for routine immunization of DPT-1 or Penta-1, DPT-2 or Penta-2, DPT-3 or Penta-3 and Measles vaccine | Children > 24 months of age<br>High-income countries<br>Children for immunization for BCG, Rabies, Vitamin A supplementation, PCV, and Rotavirus, |
| <b>Intervention</b> | Mobile-phone reminders: Short message service (SMS) or text message reminders                                                                                                           | Phone call, E-mails, or Multi-media service (MMS) reminders<br>Letters and paper correspondence<br>Smartphone-based apps                          |
| <b>Comparison</b>   | Traditional reminder practices including informing the mother of the next vaccination appointment, or writing on the immunization card                                                  | Absence of comparator arm or the comparator arm not traditional reminder practice                                                                 |
| <b>Outcome</b>      | Coverage for DPT-3, Penta-3, or overall immunization                                                                                                                                    |                                                                                                                                                   |
| <b>Study</b>        | Randomized controlled trials, Cluster randomized trials, and Quasi-experimental studies<br>Published and unpublished (Grey) literature<br>Full study available                          | Observational studies (Cross-sectional, Case-control, Retrospective studies), Reviews, Study protocols<br>Conference abstracts, Retracted studies |

## Supplement 3: Search strategy and terms

| PubMed / MEDLINE                                                                                                                                                                                                                                                                                                                                                                                                                                                                                                                                                                                                                                                                                                                                                                                                                                                                                                                                                                                                                                                                                                                                                                                                                                                                                                                                                                                                                                                                                                                                                                                                                                                                                                                                                                                                                                                                                                                                                                                                                                                                                                                                                                                                                                                                                                                                                                                                                                                                                                                                                                                                                                                                                                                                                                                                                                                                                                                                                                                                                                                                                                                                                                                                                                                                                                                                                                                                                                                                                                                                              | Results**    |
|---------------------------------------------------------------------------------------------------------------------------------------------------------------------------------------------------------------------------------------------------------------------------------------------------------------------------------------------------------------------------------------------------------------------------------------------------------------------------------------------------------------------------------------------------------------------------------------------------------------------------------------------------------------------------------------------------------------------------------------------------------------------------------------------------------------------------------------------------------------------------------------------------------------------------------------------------------------------------------------------------------------------------------------------------------------------------------------------------------------------------------------------------------------------------------------------------------------------------------------------------------------------------------------------------------------------------------------------------------------------------------------------------------------------------------------------------------------------------------------------------------------------------------------------------------------------------------------------------------------------------------------------------------------------------------------------------------------------------------------------------------------------------------------------------------------------------------------------------------------------------------------------------------------------------------------------------------------------------------------------------------------------------------------------------------------------------------------------------------------------------------------------------------------------------------------------------------------------------------------------------------------------------------------------------------------------------------------------------------------------------------------------------------------------------------------------------------------------------------------------------------------------------------------------------------------------------------------------------------------------------------------------------------------------------------------------------------------------------------------------------------------------------------------------------------------------------------------------------------------------------------------------------------------------------------------------------------------------------------------------------------------------------------------------------------------------------------------------------------------------------------------------------------------------------------------------------------------------------------------------------------------------------------------------------------------------------------------------------------------------------------------------------------------------------------------------------------------------------------------------------------------------------------------------------------------|--------------|
| Search: ("text messag*[MeSH Terms] OR "text messag*[All Fields] OR "telemedicine"[MeSH Terms] OR ("health"[MeSH Terms] OR "health"[All Fields] OR "health s"[All Fields] OR "healthful"[All Fields] OR "healthfulness"[All Fields] OR "healths"[All Fields]) OR "reminder systems"[MeSH Terms] OR ("reminder systems"[MeSH Terms] OR ("reminder"[All Fields] AND "systems"[All Fields]) OR "reminder systems"[All Fields]) OR "messag*[All Fields] AND ("routine"[All Fields] OR "routinely"[All Fields] OR "routines"[All Fields] OR "routinization"[All Fields] OR "routinize"[All Fields] OR "routinized"[All Fields] OR "routinizing"[All Fields]) AND ("immune"[All Fields] OR "immuned"[All Fields] OR "immunes"[All Fields] OR "immunisation"[All Fields] OR "vaccination"[MeSH Terms] OR "vaccination"[All Fields] OR "immunization"[All Fields] OR "immunization"[MeSH Terms] OR "immunisations"[All Fields] OR "immunizations"[All Fields] OR "immunise"[All Fields] OR "immunised"[All Fields] OR "immuniser"[All Fields] OR "immunisers"[All Fields] OR "immunising"[All Fields] OR "immunities"[All Fields] OR "immunity"[MeSH Terms] OR "immunity"[All Fields] OR "immunization s"[All Fields] OR "immunize"[All Fields] OR "immunized"[All Fields] OR "immunizer"[All Fields] OR "immunizers"[All Fields] OR "immunizes"[All Fields] OR "immunizing"[All Fields]) AND ("Afghanistan" OR "Albania" OR "Algeria" OR "American Samoa" OR "Angola" OR "Argentina" OR "Armenia" OR "Azerbaijan" OR "Bangladesh" OR "Belarus" OR "Belize" OR "Benin" OR "Bhutan" OR "Bolivia" OR "Bosnia and Herzegovina" OR "Botswana" OR "Brazil" OR "Bulgaria" OR "Burkina Faso" OR "Burundi" OR "Cabo Verde" OR "Cambodia" OR "Cameroon" OR "Central African Republic" OR "Chad" OR "China" OR "Colombia" OR "Comoros" OR "Congo Democratic Republic" OR "Congo Republic" OR "Costa Rica" OR "Côte d'Ivoire" OR "Cuba" OR "Djibouti" OR "Dominica" OR "Dominican Republic" OR "Ecuador" OR "Egypt" OR "El Salvador" OR "Equatorial Guinea" OR "Eritrea" OR "Eswatini" OR "Ethiopia" OR "Fiji" OR "Gabon" OR "The Gambia" OR "Georgia" OR "Ghana" OR "Grenada" OR "Guatemala" OR "Guinea" OR "Guinea-Bissau" OR "Guyana" OR "Haiti" OR "Honduras" OR "India" OR "Indonesia" OR "Iran, Islamic Republic" OR "Iraq" OR "Jamaica" OR "Jordan" OR "Kazakhstan" OR "Kenya" OR "Kiribati" OR "Korea, Democratic People's Republic" OR "Kosovo" OR "Kyrgyz Republic" OR "Lao PDR" OR "Lebanon" OR "Lesotho" OR "Liberia" OR "Libya" OR "Madagascar" OR "Malawi" OR "Malaysia" OR "Maldives" OR "Mali" OR "Marshall Islands" OR "Mauritania" OR "Mexico" OR "Micronesia" OR "Moldova" OR "Mongolia" OR "Montenegro" OR "Morocco" OR "Mozambique" OR "Myanmar" OR "Namibia" OR "Nepal" OR "Nicaragua" OR "Niger" OR "Nigeria" OR "North Macedonia" OR "Pakistan" OR "Papua New Guinea" OR "Paraguay" OR "Peru" OR "Philippines" OR "Russian Federation" OR "Rwanda" OR "Samoa" OR "São Tomé and Príncipe" OR "Senegal" OR "Serbia" OR "Sierra Leone" OR "Solomon Islands" OR "Somalia" OR "South Africa" OR "South Sudan" OR "Sri Lanka" OR "St. Lucia" OR "St. Vincent and the Grenadines" OR "Sudan" OR "Suriname" OR "Syrian Arab Republic" OR "Tajikistan" OR "Tanzania" OR "Thailand" OR "Timor-Leste" OR "Togo" OR "Tonga" OR "Tunisia" OR "Turkey" OR "Turkmenistan" OR "Tuvalu" OR "Uganda" OR "Ukraine" OR "Uzbekistan" OR "Vanuatu" OR "Venezuela" OR "Vietnam" OR "West Bank and Gaza" OR "Yemen Republic" OR "Zambia" OR "Zimbabwe") Filters: from 2000 - 2020 | 3,012        |
| <b>Other databases</b>                                                                                                                                                                                                                                                                                                                                                                                                                                                                                                                                                                                                                                                                                                                                                                                                                                                                                                                                                                                                                                                                                                                                                                                                                                                                                                                                                                                                                                                                                                                                                                                                                                                                                                                                                                                                                                                                                                                                                                                                                                                                                                                                                                                                                                                                                                                                                                                                                                                                                                                                                                                                                                                                                                                                                                                                                                                                                                                                                                                                                                                                                                                                                                                                                                                                                                                                                                                                                                                                                                                                        |              |
| ◦ CINAHL (Cumulative Index of Nursing and Allied Health Literature)                                                                                                                                                                                                                                                                                                                                                                                                                                                                                                                                                                                                                                                                                                                                                                                                                                                                                                                                                                                                                                                                                                                                                                                                                                                                                                                                                                                                                                                                                                                                                                                                                                                                                                                                                                                                                                                                                                                                                                                                                                                                                                                                                                                                                                                                                                                                                                                                                                                                                                                                                                                                                                                                                                                                                                                                                                                                                                                                                                                                                                                                                                                                                                                                                                                                                                                                                                                                                                                                                           | 879          |
| ◦ Cochrane CENTRAL                                                                                                                                                                                                                                                                                                                                                                                                                                                                                                                                                                                                                                                                                                                                                                                                                                                                                                                                                                                                                                                                                                                                                                                                                                                                                                                                                                                                                                                                                                                                                                                                                                                                                                                                                                                                                                                                                                                                                                                                                                                                                                                                                                                                                                                                                                                                                                                                                                                                                                                                                                                                                                                                                                                                                                                                                                                                                                                                                                                                                                                                                                                                                                                                                                                                                                                                                                                                                                                                                                                                            | 36           |
| ◦ CNKI (China National Knowledge Infrastructure)                                                                                                                                                                                                                                                                                                                                                                                                                                                                                                                                                                                                                                                                                                                                                                                                                                                                                                                                                                                                                                                                                                                                                                                                                                                                                                                                                                                                                                                                                                                                                                                                                                                                                                                                                                                                                                                                                                                                                                                                                                                                                                                                                                                                                                                                                                                                                                                                                                                                                                                                                                                                                                                                                                                                                                                                                                                                                                                                                                                                                                                                                                                                                                                                                                                                                                                                                                                                                                                                                                              | 241          |
| ◦ Embase (Excerpta Medica Database)                                                                                                                                                                                                                                                                                                                                                                                                                                                                                                                                                                                                                                                                                                                                                                                                                                                                                                                                                                                                                                                                                                                                                                                                                                                                                                                                                                                                                                                                                                                                                                                                                                                                                                                                                                                                                                                                                                                                                                                                                                                                                                                                                                                                                                                                                                                                                                                                                                                                                                                                                                                                                                                                                                                                                                                                                                                                                                                                                                                                                                                                                                                                                                                                                                                                                                                                                                                                                                                                                                                           | 623          |
| ◦ PsycINFO                                                                                                                                                                                                                                                                                                                                                                                                                                                                                                                                                                                                                                                                                                                                                                                                                                                                                                                                                                                                                                                                                                                                                                                                                                                                                                                                                                                                                                                                                                                                                                                                                                                                                                                                                                                                                                                                                                                                                                                                                                                                                                                                                                                                                                                                                                                                                                                                                                                                                                                                                                                                                                                                                                                                                                                                                                                                                                                                                                                                                                                                                                                                                                                                                                                                                                                                                                                                                                                                                                                                                    | 489          |
| ◦ Scopus                                                                                                                                                                                                                                                                                                                                                                                                                                                                                                                                                                                                                                                                                                                                                                                                                                                                                                                                                                                                                                                                                                                                                                                                                                                                                                                                                                                                                                                                                                                                                                                                                                                                                                                                                                                                                                                                                                                                                                                                                                                                                                                                                                                                                                                                                                                                                                                                                                                                                                                                                                                                                                                                                                                                                                                                                                                                                                                                                                                                                                                                                                                                                                                                                                                                                                                                                                                                                                                                                                                                                      | 164          |
| ◦ Web of Science                                                                                                                                                                                                                                                                                                                                                                                                                                                                                                                                                                                                                                                                                                                                                                                                                                                                                                                                                                                                                                                                                                                                                                                                                                                                                                                                                                                                                                                                                                                                                                                                                                                                                                                                                                                                                                                                                                                                                                                                                                                                                                                                                                                                                                                                                                                                                                                                                                                                                                                                                                                                                                                                                                                                                                                                                                                                                                                                                                                                                                                                                                                                                                                                                                                                                                                                                                                                                                                                                                                                              | 36           |
| <b>TOTAL SEARCH RESULT</b>                                                                                                                                                                                                                                                                                                                                                                                                                                                                                                                                                                                                                                                                                                                                                                                                                                                                                                                                                                                                                                                                                                                                                                                                                                                                                                                                                                                                                                                                                                                                                                                                                                                                                                                                                                                                                                                                                                                                                                                                                                                                                                                                                                                                                                                                                                                                                                                                                                                                                                                                                                                                                                                                                                                                                                                                                                                                                                                                                                                                                                                                                                                                                                                                                                                                                                                                                                                                                                                                                                                                    | <b>5,480</b> |

\*\* Search period was from 01 January 2000 to 31 December 2020.

**Supplement 4:** Cochrane RoB 2.0 risk of bias assessment and internal validity of included randomized controlled trials. (A): Assessment plot. (B): Summary plot

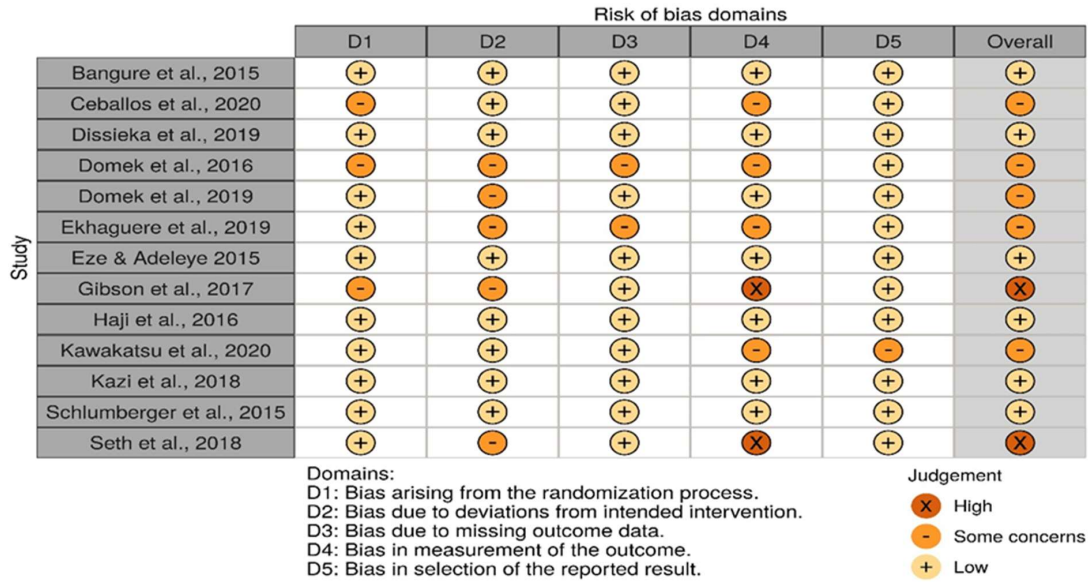

A: Assessment plot for risk of bias across five domains

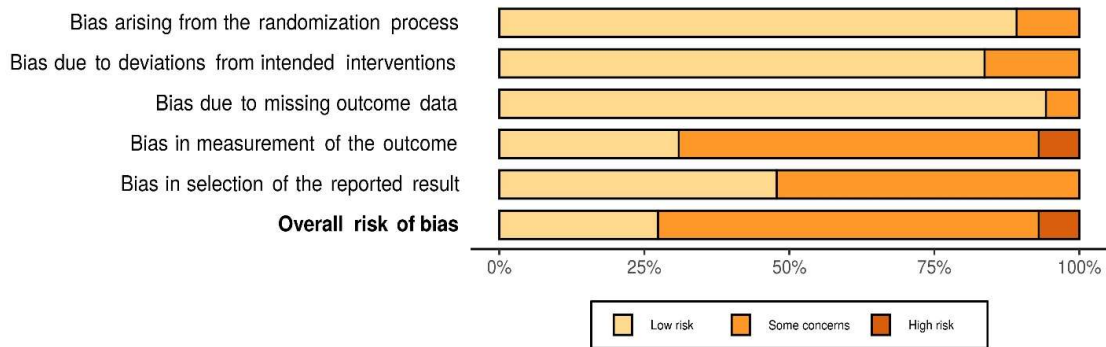

B: Summary plot using the sample size of included studies as weight.

**Supplement 5: Cochrane ROBINS-I risk of bias assessment and internal validity of included Non-randomized controlled trials.**  
 (A): Assessment plot. (B): Summary plot

|       |                      | Risk of bias domains |    |    |    |    |    |    |         |
|-------|----------------------|----------------------|----|----|----|----|----|----|---------|
|       |                      | D1                   | D2 | D3 | D4 | D5 | D6 | D7 | Overall |
| Study | Coleman et al., 2020 | ⊗                    | -  | +  | +  | !  | +  | +  | !       |
|       | Dipeolu et al., 2017 | ⊗                    | +  | +  | +  | ⊗  | +  | +  | ⊗       |
|       | Nguyen et al., 2017  | ⊗                    | +  | +  | +  | +  | +  | +  | ⊗       |
|       | Oladepo et al., 2020 | ⊗                    | +  | +  | +  | ⊗  | +  | +  | ⊗       |
|       | Uddin et al., 2016   | +                    | +  | +  | +  | +  | +  | +  | +       |

Domains:  
 D1: Bias due to confounding.  
 D2: Bias due to selection of participants.  
 D3: Bias in classification of interventions.  
 D4: Bias due to deviations from intended interventions.  
 D5: Bias due to missing data.  
 D6: Bias in measurement of outcomes.  
 D7: Bias in selection of the reported result.

Judgement  
 ! Critical  
 ⊗ Serious  
 - Moderate  
 + Low

A: Assessment plot for risk of bias across seven domains

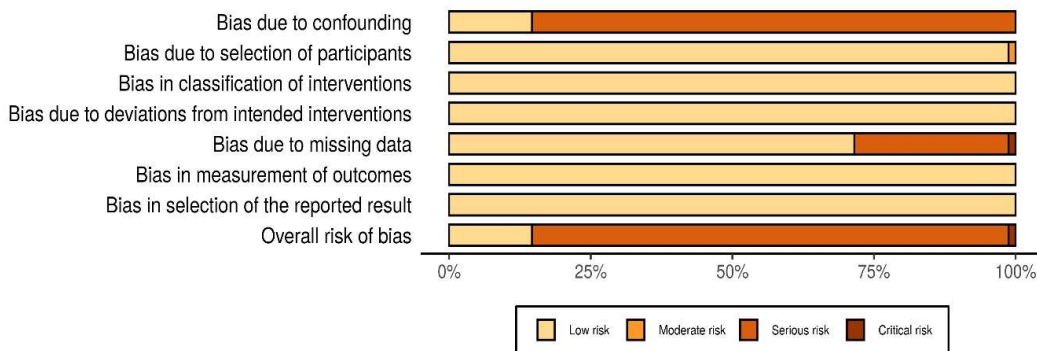

B: Summary plot using the sample size of included studies as weight.

**Supplement 6: STATA output of Meta-regression analysis for Routine immunization Coverage.**

```

stata: User Window Help
[Icons]
. meta regress i.wbinc_status i.setting

Effect-size label: Risk ratio
Effect size: _meta_es
Std. Err.: _meta_se

Random-effects meta-regression
Method: DerSimonian-Laird

Number of obs = 19
Residual heterogeneity:
    tau2 = .0086
    I2 (%) = 88.87
    H2 = 8.98
R-squared (%) = 0.09
Wald chi2(4) = 13.66
Prob > chi2 = 0.0085

+-----+-----+-----+-----+-----+-----+
|_meta_es| Coef. | Std. Err. | z | P>|z| | [95% Conf. Interval] |
+-----+-----+-----+-----+-----+-----+
|wbinc_status|      |      |      |      |      |      |
| 1 |      |      |      |      |      |      |
| 2 |      |      |      |      |      |      |
|setting|      |      |      |      |      |      |
| 1 |      |      |      |      |      |      |
| 2 |      |      |      |      |      |      |
|_cons|      |      |      |      |      |      |
+-----+-----+-----+-----+-----+-----+
Test of residual homogeneity: Q_res = chi2(14) = 125.74 Prob > Q_res = 0.0000

Command

```

LEGEND: Variable **wbinc\_status** refers to income status of countries based on 2020 World Bank classification. Reference group is wbinc\_status 0: upper middle-income country; and setting 0: urban setting.

- wbinc\_status 1: Lower middle-income country;
- wbinc\_status 2: Low-income country
- setting 1: mixed setting
- setting 2: rural setting

**Supplement 7:** Funnel plot graph of publication bias assessment (Immunization coverage).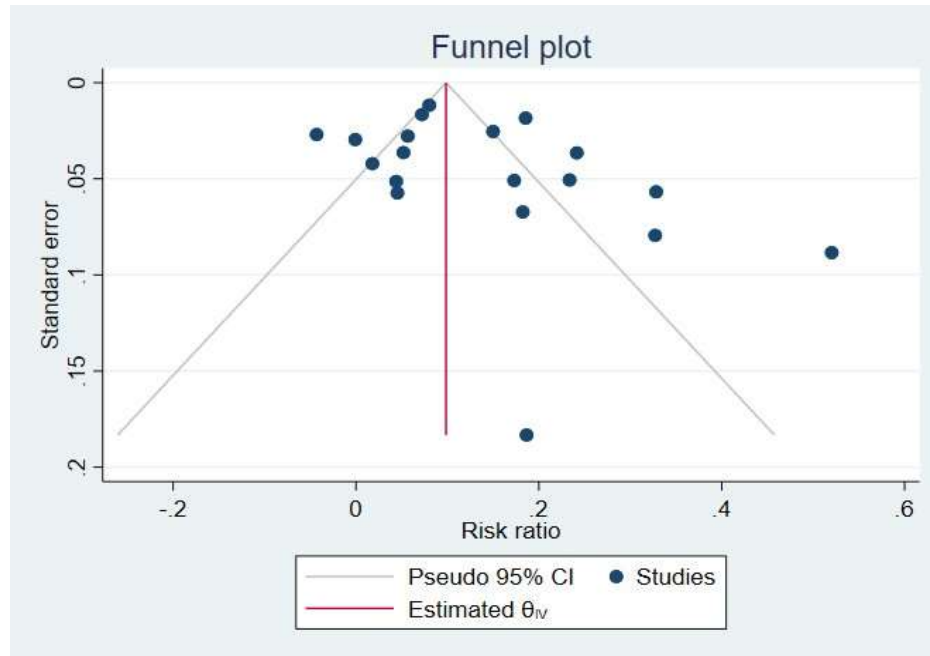

**Supplement 8:** STATA output of Harbord test to assess publication bias in included studies (Immunization coverage).

```
. meta bias i.wbinc_status i.design i.setting i.no_of_sms i.last_sms_sent i.quality, harbord

Effect-size label: Risk ratio
Effect size: _meta_es
Std. Err.: _meta_se

Regression-based Harbord test for small-study effects
Random-effects model
Method: DerSimonian-Laird
Moderators: wbinc_status design setting no_of_sms last_sms_sent quality

H0: beta1 = 0; no small-study effects
      beta1 =      1.02
SE of beta1 =      0.813
          z =      1.26
Prob > |z| =      0.2088
```



**Supplement 9: STATA output of Meta-regression analysis for Routine immunization Timeliness.**

```

tics  User  Window  Help
[Icons]
. meta regress i.no_of_sms, random(dlaird)

Effect-size label: Risk ratio
Effect size: _meta_es
Std. Err.: _meta_se

Random-effects meta-regression
Method: DerSimonian-Laird

Number of obs = 12
Residual heterogeneity:
tau2 = .012
I2 (%) = 86.74
H2 = 7.54
R-squared (%) = 0.00
Wald chi2(1) = 7.04
Prob > chi2 = 0.0080

+-----+-----+-----+-----+-----+-----+
| _meta_es | Coef. | Std. Err. | z | P>|z| | [95% Conf. Interval] |
+-----+-----+-----+-----+-----+-----+
| 1.no_of_sms | .2396528 | .0903396 | 2.65 | 0.008 | .0625903 .4167152 |
| _cons | .130824 | .0442089 | 2.96 | 0.003 | .0441761 .2174718 |
+-----+-----+-----+-----+-----+-----+

Test of residual homogeneity: Q_res = chi2(10) = 75.43 Prob > Q_res = 0.0000

.

Command

```

LEGEND: no\_of\_sms refers to the number of SMS reminders sent prior to the appointment

Reference group is no\_of\_sms 0: sent only one or two SMS reminders.

- no\_of\_sms 1: sent more than two SMS reminders.

**Supplement 10:** Funnel plot graph of publication bias assessment (Immunization timeliness)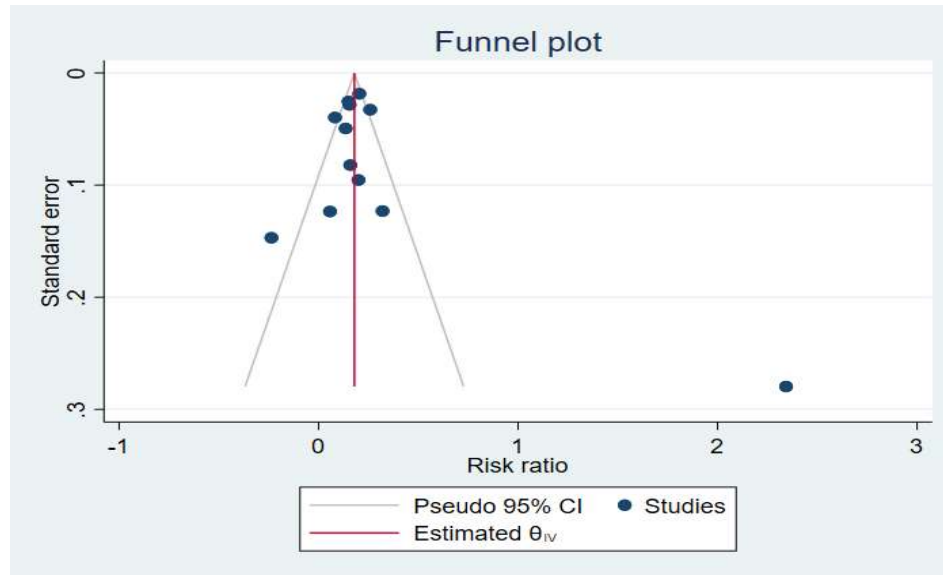

**Supplement 11:** STATA output of Harbord test to assess publication bias in included studies (Immunization timeliness)

```
. meta bias i.wbinc_status i.design i.setting i.outcome i.definition i.no_of_sms i.last_sms_sent i.quality, harbord

Effect-size label: Risk ratio
Effect size: _meta_es
Std. err.: _meta_se

Regression-based Harbord test for small-study effects
Random-effects model
Method: DerSimonian-Laird
Moderators: wbinc_status design setting outcome definition no_of_sms last_sms_sent quality

H0: beta1 = 0; no small-study effects
      beta1 =    54.01
SE of beta1 =  146.568
           z =     0.37
Prob > |z| =    0.7125
```

**Supplement 12: GRADE assessment of the certainty of evidence in included studies (Immunization coverage and timeliness)**

**Author(s):** Phil Eke, Lucky Osaeni Lawani, and Yusra Acharya  
**Question:** SMS reminders compared to Usual care for improving childhood immunization coverage and timeliness  
**Setting:** Low- and middle-income countries (LMIC)  
**Bibliography:**

| No of studies                                                                                                          | Study design          | Certainty assessment |                      |              |             |                                                                                                                   | No of patients    |                   | Effect                           |                                                          | Certainty        | Importance |
|------------------------------------------------------------------------------------------------------------------------|-----------------------|----------------------|----------------------|--------------|-------------|-------------------------------------------------------------------------------------------------------------------|-------------------|-------------------|----------------------------------|----------------------------------------------------------|------------------|------------|
|                                                                                                                        |                       | Risk of bias         | Inconsistency        | Indirectness | Imprecision | Other considerations                                                                                              | SMS reminders     | Usual care        | Relative (95% CI)                | Absolute (95% CI)                                        |                  |            |
| <b>Immunization coverage (follow up: mean 9 months); assessed with: change in childhood immunization coverage )</b>    |                       |                      |                      |              |             |                                                                                                                   |                   |                   |                                  |                                                          |                  |            |
| 13                                                                                                                     | randomised trials     | serious <sup>a</sup> | serious <sup>b</sup> | not serious  | not serious | strong association                                                                                                | 6296/8685 (72.5%) | 4876/7291 (66.9%) | <b>RR 1.13</b><br>(1.06 to 1.20) | <b>87 more per 1,000</b><br>(from 40 more to 134 more)   | ⊕⊕⊕⊖<br>MODERATE | CRITICAL   |
| <b>Immunization coverage (follow up: mean 9 months); assessed with: change in childhood immunization coverage)</b>     |                       |                      |                      |              |             |                                                                                                                   |                   |                   |                                  |                                                          |                  |            |
| 6                                                                                                                      | observational studies | serious <sup>c</sup> | serious <sup>d</sup> | not serious  | not serious | all plausible residual confounding would reduce the demonstrated effect                                           | 5742/7134 (80.5%) | 4919/7062 (69.7%) | <b>RR 1.22</b><br>(1.12 to 1.32) | <b>153 more per 1,000</b><br>(from 84 more to 223 more)  | ⊕⊕⊕⊖<br>MODERATE | CRITICAL   |
| <b>Immunization timeliness (follow up: mean 9 months); assessed with: change in timely completion of immunization)</b> |                       |                      |                      |              |             |                                                                                                                   |                   |                   |                                  |                                                          |                  |            |
| 10                                                                                                                     | randomised trials     | serious <sup>e</sup> | serious <sup>f</sup> | not serious  | not serious | strong association dose response gradient                                                                         | 3015/7355 (40.2%) | 2561/5932 (43.2%) | <b>RR 1.21</b><br>(1.09 to 1.34) | <b>91 more per 1,000</b><br>(from 39 more to 147 more)   | ⊕⊕⊕⊕<br>HIGH     | IMPORTANT  |
| <b>Immunization timeliness (follow up: mean 9 months); assessed with: change in timely completion of immunization)</b> |                       |                      |                      |              |             |                                                                                                                   |                   |                   |                                  |                                                          |                  |            |
| 2                                                                                                                      | observational studies | not serious          | not serious          | not serious  | not serious | strong association all plausible residual confounding would reduce the demonstrated effect dose response gradient | 4343/5828 (71.1%) | 3611/5747 (62.8%) | <b>RR 1.25</b><br>(1.19 to 1.32) | <b>157 more per 1,000</b><br>(from 119 more to 201 more) | ⊕⊕⊕⊕<br>HIGH     | IMPORTANT  |

CI: Confidence interval; RR: Risk ratio

**Explanations**

- a. Based on weighted risk using trial's sample size, 30% of the included RCTs were rated as having a low risk of bias, about 60% as having some concerns, and about 10% high risk of bias
- b. High heterogeneity as evidenced by I-square = 89.6% and little overlapping of confidence intervals of included trials
- c. Based on weighted risk using trial's sample size, 15% of the included non-RCTs were rated as having a low risk of bias, 82% as having serious risk of bias, and about 3% critical risk of bias
- d. High heterogeneity as evidenced by I-square = 92.2% and little overlapping of confidence intervals of included trials
- e. Based on weighted risk using trial's sample size, 30% of the included RCTs were rated as having a low risk of bias, about 60% as having some concerns, and about 10% high risk of bias
- f. High heterogeneity as evidenced by I-square = 87.9% and little overlapping of confidence intervals of included trials
